# Supplementary material for: Association of bilateral salpingo-oophorectomy with all cause and cause specific mortality: population based cohort study
Source: PubMed Central journal article supplement — BMJ. 2021 Dec 9;375:e067528. doi: 10.1136/bmj-2021-067528 (PMC8653240; doi:10.1136/bmj-2021-067528), 2021-12-09
Supplement: cusm067528.ww.pdf [file cusm067528.ww.pdf]

## **ONLINE-ONLY APPENDICES**

**Appendix 1.** Codes for hysterectomy and salpingo-oophorectomy.

**Appendix 2.** Inclusion & exclusion criteria, with relevant codes.

**Appendix 3.** International Classification of Diseases (ICD)-9 and -10 codes for major gynecologic diagnoses documented on the inpatient or outpatient admission for hysterectomy.

**Appendix 4.** Codes and algorithms used to ascertain specific comorbidities and outcomes.

**Appendix 5.** Weighted baseline characteristics for women (aged 30-70 years) undergoing bilateral salpingo-oophorectomy (BSO) versus ovarian conservation, stratified by age group at surgery (<45, 45-49, 50-54,  $\geq$ 55 years).

**Appendix 6.** Unweighted mortality outcomes for women (aged 30-70 years) undergoing bilateral salpingo-oophorectomy (BSO) versus ovarian conservation, stratified by age group at surgery (<45, 45-49, 50-54,  $\geq$ 55 years).

**Appendix 7.** Weighted cumulative incidence of non-cancer death in women (aged 30-70 years) undergoing non-malignant hysterectomy with bilateral salpingo-oophorectomy or ovarian conservation, stratified by age group at surgery (<45, 45-49, 50-54,  $\geq$ 55 years).

**Appendix 8.** Weighted cumulative incidence of cancer death in women (aged 30-70 years) undergoing non-malignant hysterectomy with bilateral salpingo-oophorectomy or ovarian conservation, stratified by age group at surgery (<45, 45-49, 50-54,  $\geq$ 55 years).

**Appendix 9.** (a) Women (aged 30-70 years) undergoing bilateral salpingo-oophorectomy (BSO) at some point after non-malignant hysterectomy, and (b) sensitivity analyses modelling BSO as a time-varying covariate in a traditional multivariable Cox proportional hazards model; ovarian conservation serves as the referent category.

**Appendix 10.** Association between bilateral salpingo-oophorectomy and (a) death due to cardiovascular disease, and (b) death due to upper gastrointestinal tract cancer in women (aged 30-70 years) undergoing non-malignant hysterectomy.

**Appendix 1.** Codes for hysterectomy and salpingo-oophorectomy. Patients required a procedure code for hysterectomy in the Discharge Abstract Database or Same Day Surgery database, and a surgeon billing claim for hysterectomy in the Ontario Health Insurance Plan database, within 6 weeks of each other to be eligible for inclusion.

| Procedure             | Technique    | DAD/SDS Codes                                               |                            | OHIP Codes                                     |
|-----------------------|--------------|-------------------------------------------------------------|----------------------------|------------------------------------------------|
|                       |              | Years 1996-2001                                             | Years 2002+                |                                                |
| Total hysterectomy    | Open         | 1.RM.89.LA                                                  | 80.3                       | S710, S757, S758, S759, S763, S769, S810, S816 |
|                       | Laparoscopic | 1.RM.89.DA, 1.RM.89.AA                                      | N/A                        |                                                |
|                       | Robotic      | 1.RM.89.^ + 7.SF.14.ZX                                      | N/A                        |                                                |
| Subtotal hysterectomy | Open         | 1.RM.87.LA                                                  | 80.2                       |                                                |
|                       | Laparoscopic | 1.RM.87.DA, 1.RM.87.BA, 1.RM.87.CA                          | N/A                        |                                                |
|                       | Robotic      | 1.RM.87.^ + 7.SF.14.ZX                                      | N/A                        |                                                |
| Radical hysterectomy  | Open         | 1.RM.91.LA                                                  | 80.5                       |                                                |
|                       | Laparoscopic | 1.RM.91.DA, 1.RM.91.AA                                      | NA                         |                                                |
|                       | Robotic      | 1.RM.91.^ + 7.SF.14.ZX                                      | NA                         |                                                |
| Salpingo-oophorectomy | Unilateral   | 1.RB.89.^, 1.RD.89.^<br>[location attribute (L)eft/(R)ight] | 77.2, 77.3                 | N/A                                            |
|                       | Bilateral    | 1.RB.89.^, 1.RD.89.^<br>[location attribute (B)ilateral]    | 77.41, 77.42, 77.51, 77.52 |                                                |

Abbreviations: CCI (Canadian Classification of Intervention); DAD (Discharge Abstract Database); OHIP (Ontario Health Insurance Plan); SDS (Same Day Surgery database)

**Appendix 2.** Inclusion & exclusion criteria, with relevant codes.

| Criteria                                                                                                                                           | Source             | Codes                                                                                                                                                                                                                                                                                                                                                                                                                                                                                                                                                                                                                    |
|----------------------------------------------------------------------------------------------------------------------------------------------------|--------------------|--------------------------------------------------------------------------------------------------------------------------------------------------------------------------------------------------------------------------------------------------------------------------------------------------------------------------------------------------------------------------------------------------------------------------------------------------------------------------------------------------------------------------------------------------------------------------------------------------------------------------|
| <b>Inclusion Criteria</b>                                                                                                                          |                    |                                                                                                                                                                                                                                                                                                                                                                                                                                                                                                                                                                                                                          |
| 1. Female patient                                                                                                                                  | RPDB               | SEX=F                                                                                                                                                                                                                                                                                                                                                                                                                                                                                                                                                                                                                    |
| 2. Age 30-70 years at index date                                                                                                                   | RPDB               | Based on variables BDATE and BYEAR                                                                                                                                                                                                                                                                                                                                                                                                                                                                                                                                                                                       |
| 3. Record of abdominal hysterectomy in DAD/SDS and OHIP (+/-6 weeks) from January 1, 1996 to December 31, 2015, and performed on an elective basis | DAD<br>SDS         | Hysterectomy codes: Supplemental Table 1<br>Admission category variable: ADMCAT=L                                                                                                                                                                                                                                                                                                                                                                                                                                                                                                                                        |
| <b>Exclusion Criteria</b>                                                                                                                          |                    |                                                                                                                                                                                                                                                                                                                                                                                                                                                                                                                                                                                                                          |
| 1. Non-Ontario residents ineligible for universal health insurance coverage                                                                        | RPDB               | - IKN=Invalid<br>- First two digits of PRCDABLK not 35<br>- Death or loss of OHIP prior to index date                                                                                                                                                                                                                                                                                                                                                                                                                                                                                                                    |
| 2. Suspected emergent hysterectomy                                                                                                                 | OHIP<br>DAD<br>SDS | - Surgery between midnight and 7AM: E410<br>- Peripartum indication for hysterectomy (PATSERV=51, 53, or 59) <sup>1</sup>                                                                                                                                                                                                                                                                                                                                                                                                                                                                                                |
| 3. Malignant indication for hysterectomy or a prior breast cancer diagnosis                                                                        | OCR<br>DAD<br>SDS  | - Gynecologic cancer diagnosed any time prior or up to six weeks after index date (ICD-9: 179-184; ICD-10: C510-C58, C481, C48.2)<br><br>- Main indication for index surgical admission was either a cancer diagnosis or a gynecologic neoplasm of uncertain or unknown behaviour: ICD-9: 140-208, 2360, 2362, 2361, 2363; ICD-10: C00-C97, D390, D391, D392, D397, D399<br><br>- Documentation of prophylactic surgery for malignancy before or on index date (mastectomy, hysterectomy, salpingo-oophorectomy): ICD-9: V50.4, ICD-10 Z40<br><br>- Breast cancer diagnosis prior to index date: ICD-9: 174; ICD-10: C50 |
| 4. Bilateral salpingo-oophorectomy prior to index date                                                                                             | DAD<br>SDS         | Salpingo-oophorectomy codes: Supplemental Table 1                                                                                                                                                                                                                                                                                                                                                                                                                                                                                                                                                                        |

Abbreviations: DAD (Discharge Abstract Database); OHIP (Ontario Health Insurance Plan); SDS (Same Day Surgery database); RPDB (Registered Persons Database)

1) Codes derived from: Canadian Institute for Health Information (CIHI). Technical Note: Hysterectomy Readmission. Accessed at: <[https://www.cihi.ca/en/technical-note-hysterectomy-readmission-0#P14\\_938](https://www.cihi.ca/en/technical-note-hysterectomy-readmission-0#P14_938)>

**Appendix 3.** International Classification of Diseases (ICD)-9 and -10 codes for major gynecologic diagnoses documented on the inpatient or outpatient admission for hysterectomy. Patients could have multiple diagnoses if relevant.

| Indication                                   | Definition                                          | ICD-10 Codes           | ICD-9 Codes |
|----------------------------------------------|-----------------------------------------------------|------------------------|-------------|
| <b>Premalignant Conditions</b>               |                                                     |                        |             |
|                                              | Endometrial hyperplasia                             | N850, N851             | 6213        |
|                                              | Cervical dysplasia                                  | N870, N871, N872, N879 | 6221        |
|                                              | Vaginal dysplasia                                   | N890, N891, N892, N893 | 6230        |
|                                              | Vulvar dysplasia                                    | N900, N901, N902, N903 | N/A         |
|                                              | CIS cervix                                          | D060, D061, D067, D069 | 2331        |
|                                              | CIS vagina                                          | D072                   | N/A         |
|                                              | CIS vulva                                           | D071                   | N/A         |
|                                              | CIS endometrium/uterus                              | D070                   | 2332        |
|                                              | CIS unspecified female genital organs               | D073                   | 2333        |
| <b>Benign Ovarian Cysts</b>                  |                                                     |                        |             |
|                                              | Benign neoplasm ovary                               | D27                    | 220, 2200   |
|                                              | Follicular ovarian cyst                             | N830                   | 6200        |
|                                              | Corpus luteum cyst                                  | N831                   | 6201        |
|                                              | Other & unspecified ovarian cysts                   | N832                   | 6202        |
|                                              | Neoplasm of uncertain or unknown behaviour of ovary | D391                   | 2362        |
| <b>Abnormal Uterine Bleeding<sup>1</sup></b> |                                                     |                        |             |
|                                              | Heavy menstrual bleeding                            |                        |             |
|                                              | Excessive/frequent, regular cycle                   | N920                   | 6262        |
|                                              | Excessive/frequent, irregular cycle                 | N921                   | 6262        |
|                                              | Excessive in premenopause                           | N924                   | 6270        |
|                                              | Irregular, other                                    | N925                   | 6264, 6266  |
|                                              | Irregular, unspecified                              | N926                   | 6264, 6266  |
|                                              | Abnormal, other                                     | N938                   | 6268        |
|                                              | Abnormal, unspecified                               | N939                   | 6269        |
|                                              | Excessive menstruation at puberty                   | N922                   | 6263        |
|                                              | Ovulation bleeding                                  | N923                   | 6265        |
|                                              | Postcoital and contact bleeding                     | N930                   | 6267        |
|                                              | Postmenopausal bleeding                             | N950                   | 6271        |
| <b>Fibroids<sup>2</sup></b>                  |                                                     |                        |             |
|                                              | Fibroids                                            | D25                    | 218         |
|                                              | Submucous leiomyoma                                 | D250                   | 2180        |
|                                              | Intramural leiomyoma                                | D251                   | 2181        |
|                                              | Subserosal leiomyoma                                | D252                   | 2182        |
|                                              | Leiomyoma of uterus, unspecified                    | D259                   | 2189        |
| <b>Endometriosis</b>                         |                                                     |                        |             |
|                                              | Uterus                                              | N800                   | 6170        |

|                                       |                                                                                                                                        |                                                                   |                                              |
|---------------------------------------|----------------------------------------------------------------------------------------------------------------------------------------|-------------------------------------------------------------------|----------------------------------------------|
|                                       | Ovary                                                                                                                                  | N801                                                              | 6171                                         |
|                                       | Fallopian tube                                                                                                                         | N802                                                              | 6172                                         |
|                                       | Pelvic peritoneum                                                                                                                      | N803                                                              | 6173                                         |
|                                       | Rectovaginal septum/vagina                                                                                                             | N804                                                              | 6174                                         |
|                                       | Intestine                                                                                                                              | N805                                                              | 6175                                         |
|                                       | Cutaneous scar                                                                                                                         | N806                                                              | 6176                                         |
|                                       | Other, unspecified                                                                                                                     | N808, N809                                                        | 6178, 6179                                   |
| <b>Prolapse<sup>2</sup></b>           |                                                                                                                                        |                                                                   |                                              |
|                                       | Female urethrocele                                                                                                                     | N810                                                              | N/A                                          |
|                                       | Cystocele                                                                                                                              | N811                                                              | N/A                                          |
|                                       | Incomplete uterovaginal prolapse                                                                                                       | N812                                                              | 6182                                         |
|                                       | Complete uterovaginal prolapse                                                                                                         | N813                                                              | 6183                                         |
|                                       | Uterovaginal prolapse, unspecified                                                                                                     | N814                                                              | 6184                                         |
|                                       | Vaginal enterocele                                                                                                                     | N815                                                              | 6186                                         |
|                                       | Rectocele                                                                                                                              | N816                                                              | N/A                                          |
|                                       | Other female genital prolapse                                                                                                          | N818                                                              | 6188                                         |
|                                       | Female genital prolapse, unspecified                                                                                                   | N819                                                              | 6189                                         |
|                                       | Prolapse of vaginal wall                                                                                                               | N/A                                                               | 6180                                         |
|                                       | Uterine prolapse                                                                                                                       | N/A                                                               | 6181                                         |
|                                       | Postoperative vaginal prolapse                                                                                                         | N/A                                                               | 6185                                         |
|                                       | Old laceration of pelvic muscle                                                                                                        | N/A                                                               | 6187                                         |
| <b>Pelvic Pain &amp; Inflammation</b> |                                                                                                                                        |                                                                   |                                              |
| Inflammation                          | Salpingitis and oophoritis                                                                                                             | N700, N701, N709                                                  | 6140, 6141, 6142                             |
|                                       | Inflammatory disease of uterus                                                                                                         | N710, N711, N719                                                  | 6143, 6144, 6150, 6151, 6159                 |
|                                       | Inflammatory disease of cervix                                                                                                         | N72                                                               | 6160                                         |
|                                       | Parametritis, pelvic cellulitis, pelvic peritonitis, pelvic peritoneal adhesions, other/unspecified female pelvic inflammatory disease | N730, N731, N732, N733, N734, N735, N736, N738, N739              | 6145, 6146, 6147, 6148, 6149                 |
|                                       | Pelvic inflammatory disease (tuberculous, syphilitic, gonococcal, chlamydial, other, unspecified)                                      | N740, N741, N742, N743, N744, N748                                | 614, 615                                     |
|                                       | Bartholin's cyst/abscess/disease                                                                                                       | N750, N751, N758, N759                                            | 6162, 6163                                   |
|                                       | Vaginitis/vulvitis/ulceration                                                                                                          | N760, N761, N762, N763, N764, N765, N766, N768, N7680, N7688      | 6161, 61610, 61611, 6164, 6165, 61650, 61651 |
|                                       | Vulvovaginal ulceration and inflammation NEC                                                                                           | N770, N771, N778                                                  | 6168, 6169                                   |
| Abdominal & pelvic pain               | Acute abdomen, RUQ/LUQ, RLQ/LLQ, pelvic/perineal pain, other/unspecified abdominal pain                                                | R100, R1010, R1011, R1012, R1019, R102, R1030, R1032, R1039, R104 | 7890                                         |
|                                       | Acute, chronic, or other pain                                                                                                          | R520, R521, R522, R529                                            | N/A                                          |
| Menstrual pain                        | Mittelschmerz                                                                                                                          | N940                                                              | 6252                                         |

|  |                                                                                      |      |            |
|--|--------------------------------------------------------------------------------------|------|------------|
|  | Dyspareunia                                                                          | N941 | 6250       |
|  | Vaginismus                                                                           | N942 | 6251       |
|  | Premenstrual tension syndrome                                                        | N943 | 6254, 6255 |
|  | Primary dysmenorrhea                                                                 | N944 | 6253       |
|  | Secondary dysmenorrhea                                                               | N945 | 6253       |
|  | Dysmenorrhea, unspecified                                                            | N946 | 6253       |
|  | Other specified conditions associated with female genital organs and menstrual cycle | N948 | N/A        |
|  | Unspecified condition associated with female genital organs and menstrual cycle      | N949 | N/A        |

1) Codes for heavy menstrual bleeding have been previously used by Bansi-Matharu et al. (Citation: Bansi-Matharu L, Gurol-Urganci I, Mahmood TA, Templeton A, van der Meulen JH, Cromwell DA. Rates of subsequent surgery following endometrial ablation among English women with menorrhagia: population-based cohort study. *BJOG*. 2013;120(12):1500-1507.)

2) Codes for fibroids and prolapse have been previously used by Reeves et al. (Citation: Reeves GK, Balkwill A, Cairns BJ, Green J, Beral V, Million Women Study C. Hospital admissions in relation to body mass index in UK women: a prospective cohort study. *BMC Med*. 2014;12:45.)

**Appendix 4.** Codes and algorithms used to ascertain specific comorbidities and outcomes.

| <b>Comorbidity</b>                    | <b>Source</b>                                                    | <b>Relevant Codes</b>                                                                                                                                                                                                                                                     | <b>Algorithm &amp; Citation</b>                                                                                                                                                                                      |
|---------------------------------------|------------------------------------------------------------------|---------------------------------------------------------------------------------------------------------------------------------------------------------------------------------------------------------------------------------------------------------------------------|----------------------------------------------------------------------------------------------------------------------------------------------------------------------------------------------------------------------|
| Previous malignancy                   | - Ontario Cancer Registry                                        | ICD-10: C00-C97<br>ICD-9: 140-208                                                                                                                                                                                                                                         | Not applicable                                                                                                                                                                                                       |
| Hypertension                          | - Ontario Hypertension Database<br>- DAD<br>- SDS<br>- OHIP      | ICD-9: 401, 402, 403, 404, 405<br>ICD-10: I10, I11, I12, I13, I15<br>OHIP: 401, 402, 403, 404, 405                                                                                                                                                                        | Tu et al. Prevalence and incidence of hypertension from 1995 to 2005: a population-based study. CMAJ. 2008; 178(11): 1429-1435.<br><br>SN: 72%<br>SP: 95%                                                            |
| Diabetes                              | - Ontario Diabetes Database<br>- DAD<br>- SDS<br>- OHIP<br>- ODB | ICD-9: 250<br>ICD-10: E10, E11, E13, E14<br>OHIP: 250, K030, K045, K046, Q040<br>SUBCLNAM = Insulins; oral anti-glycemics                                                                                                                                                 | Lipscombe et al. Identifying diabetes cases from administrative data: a population-based validation study. BMC Health Serv Res. 2018;18(1):316.<br><br>SN: 90.0%<br>SP: 97.7%                                        |
| Chronic obstructive pulmonary disease | - COPD Database<br>- OHIP<br>- DAD<br>- SDS                      | OHIP: 491, 492, 496<br>ICD-10: J41, J43, J44                                                                                                                                                                                                                              | Gershon et al. Identifying individuals with physician diagnosed COPD in health administrative databases. COPD. 2009;6(5):388-394.<br><br>SN: 85.0%<br>SP: 78.4%                                                      |
| Previous cardiovascular disease       | - DAD<br>- SDS<br>- NACRS<br>- OHIP                              | Ischemic heart disease<br>ICD-10: I20-I25<br>ICD-9: 410-414<br>OHIP: 410, 412, 413<br><br>Stroke/transient ischemic attack<br>ICD-10: I60, I61, I63 (except I63.6), I64, H34.1, G45 (except G45.4), H34.0<br>ICD9: 362.3, 430, 431, 434 , 436, 435<br>OHIP: 436, 432, 435 | Tu et al. The Cardiovascular Health in Ambulatory Care Research Team (CANHEART): Using Big Data to Measure and Improve Cardiovascular Health and Healthcare Services. Circ Cardiovasc Qual Outcomes. 2015;8:204-212. |



|                                                  |                 |                                                                                                                                                                                                                                                                                                                                                                       |                                                                                                                                                                                                                              |
|--------------------------------------------------|-----------------|-----------------------------------------------------------------------------------------------------------------------------------------------------------------------------------------------------------------------------------------------------------------------------------------------------------------------------------------------------------------------|------------------------------------------------------------------------------------------------------------------------------------------------------------------------------------------------------------------------------|
|                                                  |                 | <p>Heart failure<br/>ICD-10: I500, I501, I509<br/>ICD-9: 428<br/>OHIP: 428</p> <p>Coronary revascularization<br/>CCI: 1IJ50, 1IJ54, 1IJ57GQ,<br/>1IJ76<br/>CCP: 4802, 4803, 481<br/>OHIP: Z434, G298, R742, R743</p> <p>Cardiac catheterization<br/>CCI: 3IP10<br/>CCP: 4892, 4893, 4894, 4895,<br/>4896, 4897, 4898, 4995, 4996,<br/>4997<br/>OHIP: Z442 or G297</p> |                                                                                                                                                                                                                              |
| Death due to cardiovascular disease              | - OCR<br>- ORGD | <p>Ischemic heart diseases<br/>ICD-10: I20-25<br/>ICD-9: 410-414</p> <p>Cerebrovascular diseases<br/>ICD-10: I60-69<br/>ICD-9: 430-438</p>                                                                                                                                                                                                                            | Tu et al. The Cardiovascular Health in Ambulatory Care Research Team (CANHEART): Using Big Data to Measure and Improve Cardiovascular Health and Healthcare Services. <i>Circ Cardiovasc Qual Outcomes</i> . 2015;8:204-212. |
| Death due to upper gastrointestinal tract cancer | - OCR<br>- ORGD | <p>Esophageal &amp; gastric cancer:<br/>ICD-10: C15, C16<br/>ICD-9: 150, 151</p> <p>Small bowel cancer:<br/>ICD-10: C170<br/>ICD-9: 152</p> <p>Liver &amp; biliary cancer:<br/>ICD-10: C22, C23, C24<br/>ICD-9: 155, 156</p>                                                                                                                                          | Public Health Surveillance and Environmental Health Branch Public Health Division, Alberta Health & Wellness. ICD-9 to ICD-10 Coding with Reference to Causes of Death Grouping in Alberta. 2006.                            |

Abbreviations: Canadian Institute for Health Information Discharge Abstract Database (DAD); Canadian Institute for Health Information Same Day Surgery Database (SDS); Canadian Institute for Health Information National Ambulatory Care Reporting System (NACRS); International Classification of Diseases (ICD); Ontario Cancer Registry (OCR); Ontario Drug Benefit Database (ODB); Ontario Health Insurance Plan Database (OHIP); Ontario Registrar General–Death Database (ORGD); sensitivity (SN); specificity (SP)

**Appendix 5.** Weighted baseline characteristics for women (aged 30-70 years) undergoing bilateral salpingo-oophorectomy (BSO) versus ovarian conservation, stratified by age group at surgery (<45, 45-49, 50-54, ≥55 years). Overlap propensity score weighting mathematically produces exact balance for means of covariates included in the original logistic propensity score model.

| Characteristic                  | <45 years          |                 |             | 45-49 years        |                 |             | 50-54 years       |                 |             | >55 years         |                 |             |
|---------------------------------|--------------------|-----------------|-------------|--------------------|-----------------|-------------|-------------------|-----------------|-------------|-------------------|-----------------|-------------|
|                                 | No BSO<br>N=78,646 | BSO<br>N=17,816 | Std<br>Diff | No BSO<br>N=32,958 | BSO<br>N=22,467 | Std<br>Diff | No BSO<br>N=8,472 | BSO<br>N=18,741 | Std<br>Diff | No BSO<br>N=4,090 | BSO<br>N=17,359 | Std<br>Diff |
| Age (years)                     |                    |                 |             |                    |                 |             |                   |                 |             |                   |                 |             |
| Mean                            | 40.19              | 40.19           | 0.00        | 47.40              | 47.40           | 0.00        | 51.93             | 51.93           | 0.00        | 61.21             | 61.21           | 0.00        |
| Era of surgery, (%)             |                    |                 |             |                    |                 |             |                   |                 |             |                   |                 |             |
| 1996-2000                       | 35.12              | 35.12           | 0.00        | 25.38              | 25.38           | 0.00        | 17.43             | 17.43           | 0.00        | 16.41             | 16.41           | 0.00        |
| 2001-2005                       | 26.94              | 26.94           | 0.00        | 27.36              | 27.36           | 0.00        | 27.43             | 27.43           | 0.00        | 30.40             | 30.40           | 0.00        |
| 2006-2010                       | 18.30              | 18.30           | 0.00        | 24.11              | 24.11           | 0.00        | 28.35             | 28.35           | 0.00        | 29.22             | 29.22           | 0.00        |
| 2011-2015                       | 19.65              | 19.65           | 0.00        | 23.15              | 23.15           | 0.00        | 26.79             | 26.79           | 0.00        | 23.98             | 23.98           | 0.00        |
| Area of residence, (%)          |                    |                 |             |                    |                 |             |                   |                 |             |                   |                 |             |
| Urban                           | 83.78              | 83.78           | 0.00        | 86.34              | 86.34           | 0.00        | 86.46             | 86.46           | 0.00        | 84.02             | 84.02           | 0.00        |
| Rural                           | 16.22              | 16.22           |             | 13.66              | 13.66           |             | 13.54             | 13.54           |             | 15.98             | 15.98           |             |
| Area-level income quintile, (%) |                    |                 |             |                    |                 |             |                   |                 |             |                   |                 |             |
| Quintile 1 (low)                | 21.01              | 21.01           | 0.00        | 17.82              | 17.82           | 0.00        | 15.66             | 15.66           | 0.00        | 16.06             | 16.06           | 0.00        |
| Quintile 2                      | 20.91              | 20.91           | 0.00        | 19.62              | 19.62           | 0.00        | 19.06             | 19.06           | 0.00        | 19.24             | 19.24           | 0.00        |
| Quintile 3                      | 21.14              | 21.14           | 0.00        | 20.74              | 20.74           | 0.00        | 20.01             | 20.01           | 0.00        | 20.84             | 20.84           | 0.00        |
| Quintile 4                      | 20.34              | 20.34           | 0.00        | 21.22              | 21.22           | 0.00        | 22.19             | 22.19           | 0.00        | 21.89             | 21.89           | 0.00        |
| Quintile 5 (high)               | 16.59              | 16.59           | 0.00        | 20.60              | 20.60           | 0.00        | 23.08             | 23.08           | 0.00        | 21.96             | 21.96           | 0.00        |
| Immigration status, (%)         |                    |                 |             |                    |                 |             |                   |                 |             |                   |                 |             |
| Long-term resident              | 89.77              | 89.77           | 0.00        | 85.88              | 85.88           | 0.00        | 88.13             | 88.13           | 0.00        | 92.24             | 92.24           | 0.00        |
| Immigrant                       | 10.23              | 10.23           |             | 14.12              | 14.12           |             | 11.87             | 11.87           |             | 7.76              | 7.76            |             |
| Ethnicity, (%)                  |                    |                 |             |                    |                 |             |                   |                 |             |                   |                 |             |
| General population              | 96.12              | 96.12           | 0.00        | 94.39              | 94.39           | 0.00        | 94.58             | 94.58           | 0.00        | 96.06             | 96.06           | 0.00        |
| South Asian                     | 1.83               | 1.83            | 0.00        | 2.42               | 2.42            | 0.00        | 2.06              | 2.06            | 0.00        | 1.69              | 1.69            | 0.00        |
| Chinese                         | 2.05               | 2.05            | 0.00        | 3.19               | 3.19            | 0.00        | 3.37              | 3.37            | 0.00        | 2.24              | 2.24            | 0.00        |
| Hysterectomy type, (%)          |                    |                 |             |                    |                 |             |                   |                 |             |                   |                 |             |
| Total                           | 90.59              | 90.59           | 0.00        | 88.55              | 88.55           | 0.00        | 86.98             | 86.98           | 0.00        | 87.57             | 87.57           | 0.00        |
| Subtotal                        | 9.41               | 9.41            |             | 11.45              | 11.45           |             | 13.02             | 13.02           |             | 12.43             | 12.43           |             |
| Abnormal uterine bleeding, (%)  |                    |                 |             |                    |                 |             |                   |                 |             |                   |                 |             |
| Yes                             | 45.86              | 45.86           | 0.00        | 51.85              | 51.85           | 0.00        | 45.10             | 45.10           | 0.00        | 19.60             | 19.60           | 0.00        |

|                                                   |       |       |      |       |       |      |       |       |      |       |       |      |
|---------------------------------------------------|-------|-------|------|-------|-------|------|-------|-------|------|-------|-------|------|
| No                                                | 54.14 | 54.14 |      | 48.15 | 48.15 |      | 54.90 | 54.90 |      | 80.40 | 80.40 |      |
| <b>Fibroids, (%)</b>                              |       |       |      |       |       |      |       |       |      |       |       |      |
| Yes                                               | 40.28 | 40.28 | 0.00 | 67.95 | 67.95 | 0.00 | 71.89 | 71.89 | 0.00 | 42.27 | 42.27 | 0.00 |
| No                                                | 59.72 | 59.72 |      | 32.05 | 32.05 |      | 28.11 | 28.11 |      | 57.73 | 57.73 |      |
| <b>Endometriosis, (%)</b>                         |       |       |      |       |       |      |       |       |      |       |       |      |
| Yes                                               | 43.46 | 43.46 | 0.00 | 30.30 | 30.30 | 0.00 | 24.41 | 24.41 | 0.00 | 16.01 | 16.01 | 0.00 |
| No                                                | 56.54 | 56.54 |      | 69.70 | 69.70 |      | 75.59 | 75.59 |      | 83.99 | 83.99 |      |
| <b>Ovarian cyst, (%)</b>                          |       |       |      |       |       |      |       |       |      |       |       |      |
| Yes                                               | 22.47 | 22.47 | 0.00 | 18.44 | 18.44 | 0.00 | 83.98 | 83.98 | 0.00 | 19.16 | 19.16 | 0.00 |
| No                                                | 77.53 | 77.53 |      | 81.56 | 81.56 |      | 16.02 | 16.02 |      | 80.84 | 80.84 |      |
| <b>Pelvic pain/inflammation, (%)</b>              |       |       |      |       |       |      |       |       |      |       |       |      |
| Yes                                               | 38.89 | 38.89 | 0.00 | 22.24 | 22.24 | 0.00 | 84.93 | 84.93 | 0.00 | 11.29 | 11.29 | 0.00 |
| No                                                | 61.11 | 61.11 |      | 77.76 | 77.76 |      | 15.07 | 15.07 |      | 88.71 | 88.71 |      |
| <b>Premalignant disease, (%)</b>                  |       |       |      |       |       |      |       |       |      |       |       |      |
| Yes                                               | 6.26  | 6.26  | 0.00 | 5.85  | 5.85  | 0.00 | 92.87 | 92.87 | 0.00 | 15.87 | 15.87 | 0.00 |
| No                                                | 93.74 | 93.74 |      | 94.15 | 94.15 |      | 7.13  | 7.13  |      | 84.13 | 84.13 |      |
| <b>Prolapse, (%)</b>                              |       |       |      |       |       |      |       |       |      |       |       |      |
| Yes                                               | 2.40  | 2.40  | 0.00 | 4.73  | 4.73  | 0.00 | 10.01 | 10.01 | 0.00 | 36.77 | 36.77 | 0.00 |
| No                                                | 97.60 | 97.60 |      | 95.27 | 95.27 |      | 89.99 | 89.99 |      | 63.23 | 63.23 |      |
| <b>Comorbidities (ADGs), (%)</b>                  |       |       |      |       |       |      |       |       |      |       |       |      |
| 0-5                                               | 13.16 | 13.16 | 0.00 | 18.35 | 18.35 | 0.00 | 18.88 | 18.88 | 0.00 | 14.10 | 14.10 | 0.00 |
| 6-9                                               | 50.99 | 50.99 | 0.00 | 54.31 | 54.31 |      | 54.13 | 54.13 | 0.00 | 52.26 | 52.26 | 0.00 |
| ≥10                                               | 35.85 | 35.85 | 0.00 | 27.34 | 27.34 |      | 27.00 | 27.00 | 0.00 | 33.64 | 33.64 | 0.00 |
| <b>Hypertension, (%)</b>                          |       |       |      |       |       |      |       |       |      |       |       |      |
| Yes                                               | 11.95 | 11.95 | 0.00 | 20.31 | 20.31 | 0.00 | 27.04 | 27.04 | 0.00 | 46.58 | 46.58 | 0.00 |
| No                                                | 88.05 | 88.05 |      | 79.69 | 79.69 |      | 72.96 | 72.96 |      | 53.42 | 53.42 |      |
| <b>Diabetes, (%)</b>                              |       |       |      |       |       |      |       |       |      |       |       |      |
| Yes                                               | 5.14  | 5.14  | 0.00 | 6.03  | 6.03  | 0.00 | 6.49  | 6.49  | 0.00 | 12.34 | 12.34 | 0.00 |
| No                                                | 94.86 | 94.86 |      | 93.97 | 93.97 |      | 93.51 | 93.51 |      | 87.66 | 87.66 |      |
| <b>Chronic obstructive pulmonary disease, (%)</b> |       |       |      |       |       |      |       |       |      |       |       |      |
| Yes                                               | 4.66  | 4.66  | 0.00 | 6.55  | 6.55  | 0.00 | 6.33  | 6.33  | 0.00 | 9.98  | 9.98  | 0.00 |
| No                                                | 95.34 | 95.34 |      | 93.45 | 93.45 |      | 93.67 | 93.67 |      | 90.02 | 90.02 |      |
| <b>Prior malignancy, (%)</b>                      |       |       |      |       |       |      |       |       |      |       |       |      |
| Yes                                               | 1.15  | 1.15  | 0.00 | 1.57  | 1.57  | 0.00 | 1.74  | 1.74  | 0.00 | 2.93  | 2.93  | 0.00 |

|                                   |       |       |      |       |       |      |       |       |      |       |       |      |
|-----------------------------------|-------|-------|------|-------|-------|------|-------|-------|------|-------|-------|------|
| No                                | 98.85 | 98.85 |      | 98.43 | 98.43 |      | 98.26 | 98.26 |      | 97.07 | 97.07 |      |
| Cardiovascular disease, (%)       |       |       |      |       |       |      |       |       |      |       |       |      |
| Yes                               | 3.43  | 3.43  | 0.00 | 4.00  | 4.00  | 0.00 | 4.38  | 4.38  | 0.00 | 12.80 | 12.80 | 0.00 |
| No                                | 96.57 | 96.57 |      | 96.00 | 96.00 |      | 95.62 | 95.62 |      | 87.20 | 87.20 |      |
| Prior ovarian surgery, (%)        |       |       |      |       |       |      |       |       |      |       |       |      |
| Yes                               | 18.40 | 18.40 | 0.00 | 7.09  | 7.09  | 0.00 | 4.36  | 4.36  | 0.00 | 2.36  | 2.36  | 0.00 |
| No                                | 81.60 | 81.60 |      | 92.91 | 92.91 |      | 95.64 | 95.64 |      | 97.64 | 97.64 |      |
| Prior abdominopelvic surgery, (%) |       |       |      |       |       |      |       |       |      |       |       |      |
| 0                                 | 41.66 | 41.66 | 0.00 | 62.89 | 62.89 | 0.00 | 69.40 | 69.40 | 0.00 | 76.38 | 76.38 | 0.00 |
| 1                                 | 31.30 | 31.30 | 0.00 | 25.31 | 25.31 | 0.00 | 22.36 | 22.36 | 0.00 | 18.51 | 18.51 | 0.00 |
| 2                                 | 15.49 | 15.49 | 0.00 | 7.89  | 7.89  | 0.00 | 5.94  | 5.94  | 0.00 | 3.71  | 3.71  | 0.00 |
| 3+                                | 11.56 | 11.56 | 0.00 | 3.83  | 3.83  | 0.00 | 2.30  | 2.30  | 0.00 | 1.39  | 1.39  | 0.00 |

Abbreviations: Bilateral salpingo-oophorectomy (BSO); standardized difference (Std Diff); Johns Hopkins Aggregated Diagnosis Groups (ADGs)

**Appendix 6.** Unweighted mortality outcomes for women (aged 30-70 years) undergoing bilateral salpingo-oophorectomy (BSO) versus ovarian conservation, stratified by age group at surgery (<45, 45-49, 50-54, ≥55 years).

| Outcome                             | <45 years          |                 | 45-49 years        |                 | 50-54 years       |                 | ≥55 years         |                 |
|-------------------------------------|--------------------|-----------------|--------------------|-----------------|-------------------|-----------------|-------------------|-----------------|
|                                     | No BSO<br>N=78,646 | BSO<br>N=17,816 | No BSO<br>N=32,958 | BSO<br>N=22,467 | No BSO<br>N=8,472 | BSO<br>N=18,741 | No BSO<br>N=4,090 | BSO<br>N=17,359 |
| Follow-up (years)                   |                    |                 |                    |                 |                   |                 |                   |                 |
| Median (IQR)                        | 13 (8-17)          | 14 (8-18)       | 11 (7-15)          | 13 (8-18)       | 10 (6-14)         | 12 (7-17)       | 11 (7-14)         | 11 (6-16)       |
| Status at end of follow-up, No. (%) |                    |                 |                    |                 |                   |                 |                   |                 |
| Alive                               | 77,002 (97.9)      | 17,192 (96.5)   | 32,256 (97.9)      | 21,653 (96.4)   | 8,211 (96.9)      | 18,020 (96.2)   | 3,713 (90.8)      | 15,469 (89.1)   |
| Death*                              | 1,644 (2.1)        | 624 (3.5)       | 702 (2.1)          | 814 (3.6)       | 261 (3.1)         | 721 (3.8)       | 377 (9.2)         | 1,890 (10.9)    |
| Non-cancer                          | 928 (1.2)          | 373 (2.1)       | 299 (0.9)          | 405 (1.8)       | 109 (1.3)         | 319 (1.7)       | 203 (5.0)         | 1,117 (6.4)     |
| Cancer                              | 682 (0.9)          | 236 (1.3)       | 390 (1.2)          | 391 (1.7)       | 148 (1.7)         | 397 (2.1)       | 171 (4.2)         | 741 (4.3)       |

\* Data were missing for cause of death (N=124, 1.76% of deaths)

Abbreviations: Bilateral salpingo-oophorectomy (BSO); interquartile range (IQR), number (No.)

**Appendix 7.** Weighted cumulative incidence of non-cancer death in women (aged 30-70 years) undergoing non-malignant hysterectomy with bilateral salpingo-oophorectomy or ovarian conservation, stratified by age group at surgery (<45, 45-49, 50-54,  $\geq 55$  years).

a) <45 years

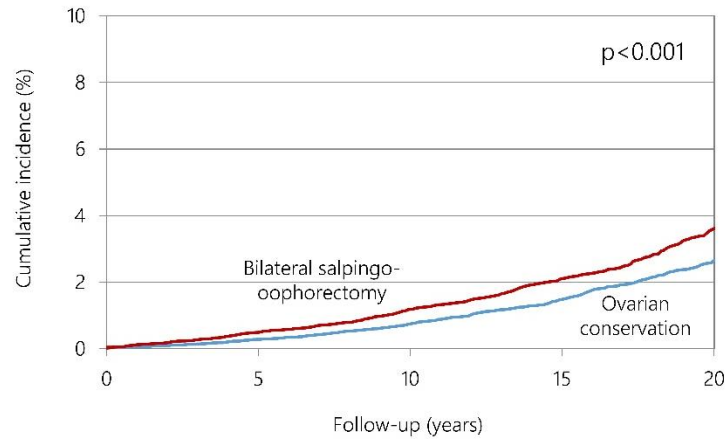

b) 45-49 years

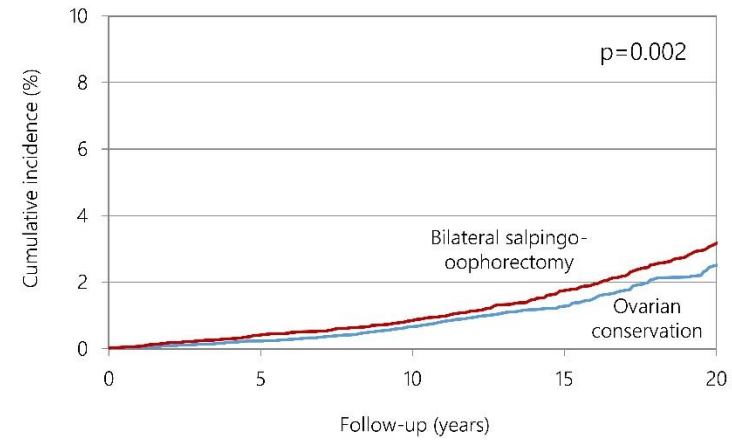

c) 50-54 years

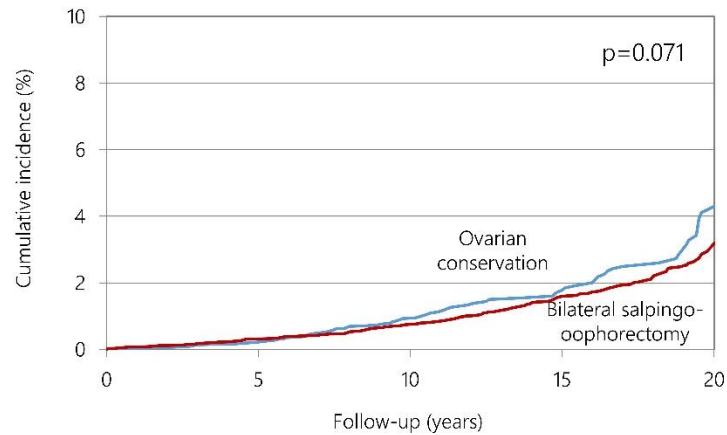

d)  $\geq 55$  years

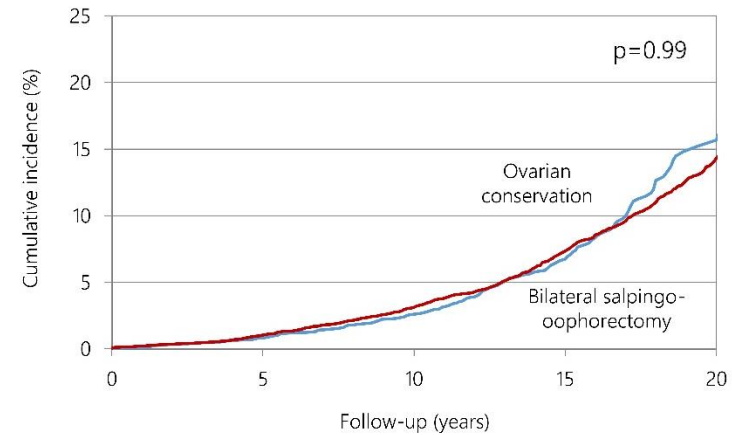

**Appendix 8.** Weighted cumulative incidence of cancer death in women (aged 30-70 years) undergoing non-malignant hysterectomy with bilateral salpingo-oophorectomy or ovarian conservation, stratified by age group at surgery (<45, 45-49, 50-54,  $\geq 55$  years).

a) <45 years

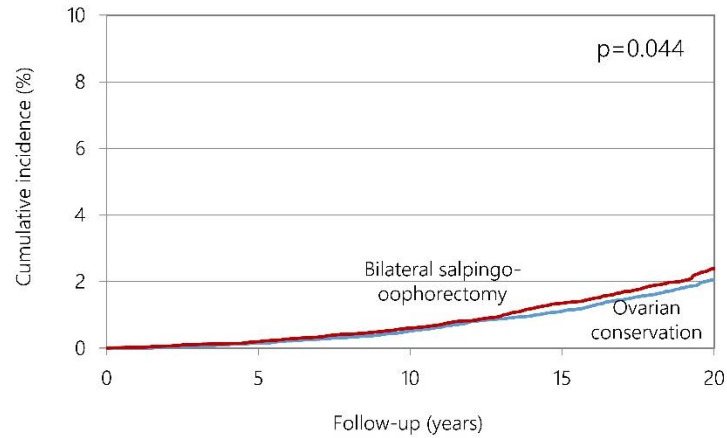

b) 45-49 years

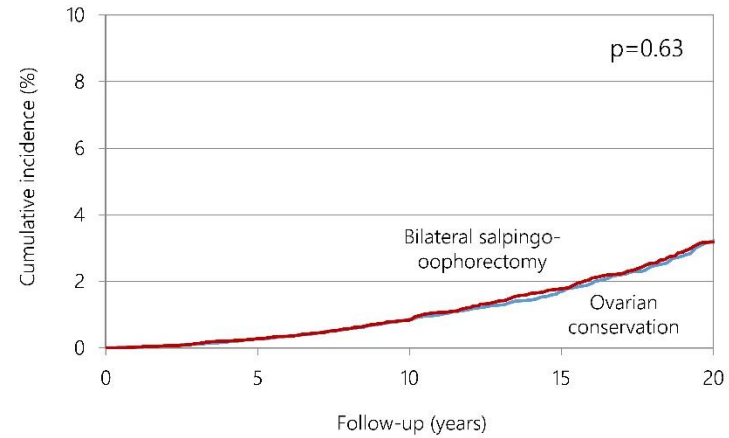

c) 50-54 years

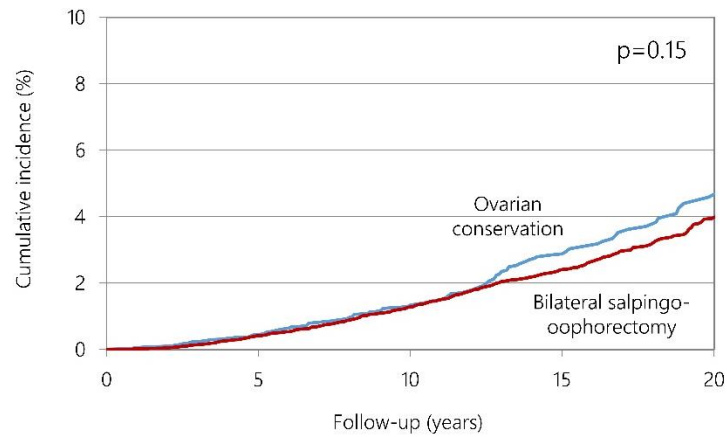

d)  $\geq 55$  years

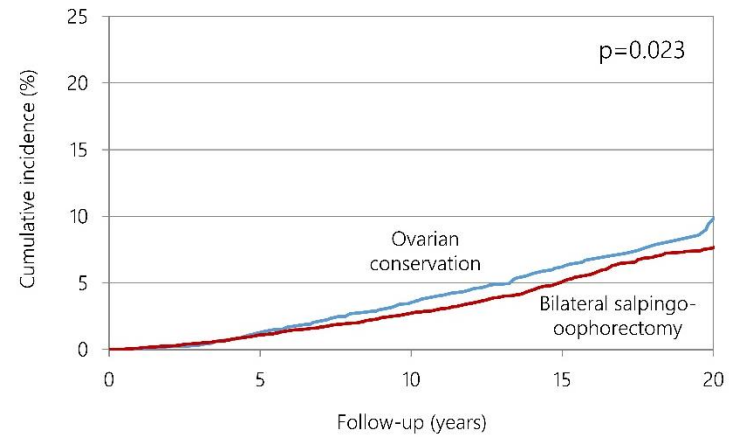

**Appendix 9.** (a) Women (aged 30-70 years) undergoing bilateral salpingo-oophorectomy (BSO) at some point after non-malignant hysterectomy, and (b) sensitivity analyses modelling BSO as a time-varying covariate in a traditional multivariable Cox proportional hazards model; ovarian conservation serves as the referent category. All analyses are stratified by age group at surgery (<45, 45-49, 50-54, ≥55 years); p<0.0125 (0.05/4) was considered statistically significant, and p-values from 0.0125-0.05 were considered marginally significant.

a)

|                                                               | <45 years<br>(N=96,462) | 45-49 years<br>(N=55,425) | 50-54 years<br>(N=27,213) | ≥55 years<br>(N=21,449) |
|---------------------------------------------------------------|-------------------------|---------------------------|---------------------------|-------------------------|
| Status at index hysterectomy, <i>No. (%)</i>                  |                         |                           |                           |                         |
| Ovarian conservation                                          | 78,646 (81.5)           | 32,958 (59.5)             | 8,472 (31.1)              | 4,090 (19.1)            |
| Bilateral salpingo-oophorectomy                               | 17,816 (18.5)           | 22,467 (40.5)             | 18,741 (68.9)             | 17,359 (80.9)           |
| Any BSO after index hysterectomy, <i>No. (%)</i> <sup>a</sup> | 2,470 (2.6)             | 597 (1.1)                 | 117 (0.4)                 | 28 (0.13)               |
| BSO for non-malignant indications <sup>b</sup>                | 1,098 (44.5)            | 211 (35.3)                | 49 (41.9)                 | 18 (64.3)               |
| BSO for ovarian mass or cancer <sup>b</sup>                   | 1,372 (55.5)            | 386 (64.7)                | 68 (58.1)                 | 10 (35.7)               |

<sup>a</sup> Denominator is patients who underwent ovarian conservation at index hysterectomy

<sup>b</sup> Denominator is patients who underwent any BSO after index hysterectomy

b)

| Outcome          | <45 years        |         | 45-49 years      |         | 50-54 years      |         | ≥55 years        |         |
|------------------|------------------|---------|------------------|---------|------------------|---------|------------------|---------|
|                  | HR (95% CI)      | p-value |
| All-cause death  | 1.25 (1.13-1.38) | <0.001  | 1.16 (1.04-1.29) | 0.010   | 0.85 (0.73-0.99) | 0.036   | 0.95 (0.84-1.07) | 0.38    |
| Non-cancer death | 1.33 (1.17-1.52) | <0.001  | 1.31 (1.12-1.54) | 0.001   | 0.82 (0.66-1.03) | 0.088   | 1.04 (0.89-1.22) | 0.60    |
| Cancer death     | 1.12 (0.95-1.31) | 0.19    | 1.03 (0.88-1.20) | 0.73    | 0.89 (0.73-1.09) | 0.25    | 0.82 (0.69-0.98) | 0.030   |

Abbreviations: CI (confidence interval); HR (hazard ratio)



**Appendix 10.** Association between bilateral salpingo-oophorectomy and (a) death due to cardiovascular disease, and (b) death due to upper gastrointestinal tract cancer in women (aged 30-70 years) undergoing non-malignant hysterectomy. All analyses were stratified by age group at surgery (<45, 45-49, 50-54, >55 years), with ovarian conservation serving as the referent category.

| Outcome                                          | <45 years        |         | 45-49 years      |         | 50-54 years      |         | ≥55 years        |         |
|--------------------------------------------------|------------------|---------|------------------|---------|------------------|---------|------------------|---------|
|                                                  | HR (95% CI)      | p-value |
| Death due to cardiovascular disease              | 1.47 (1.07-2.03) | 0.019   | 1.24 (0.86-1.80) | 0.25    | 0.91 (0.55-1.50) | 0.91    | 0.95 (0.84-1.07) | 0.83    |
| Death due to upper gastrointestinal tract cancer | 0.93 (0.50-1.75) | 0.83    | 1.07 (0.60-1.92) | 0.81    | 1.26 (0.57-2.77) | 0.57    | 1.08 (0.54-2.17) | 0.82    |
